# Supplementary material
Source: PubMed Central journal article supplement (PMC3581983)
Supplement: 1222577110_sapp.pdf [file 1222577110_sapp.pdf]

**Supporting Information for**  
**Landscape of Somatic Single Nucleotide and Copy Number Mutations in**  
**Uterine Serous Carcinoma**

Siming Zhao<sup>a</sup>, Murim Choi<sup>a</sup>, John D. Overton<sup>a</sup>, Stefania Bellone<sup>b</sup>, Dana M. Roque<sup>b</sup>, Emiliano Cocco<sup>b</sup>, Federica Guzzo<sup>b</sup>, Diana P. English<sup>b</sup>, Joyce Varughese<sup>b</sup>, Sara Gasparrini<sup>b</sup>, Ileana Bortolomai<sup>b</sup>, Natalia Buzac, Pei Hui<sup>c</sup>, Maysa Abu-Khalaf<sup>d</sup>, Antonella Ravaggi<sup>e</sup>, Eliana Bignotti<sup>e</sup>, Elisabetta Bandiera<sup>e</sup>, Chiara Romani<sup>e</sup>, Paola Todeschini<sup>e</sup>, Renata Tassi<sup>e</sup>, Laura Zanotti<sup>e</sup>, Luisa Carrara<sup>e</sup>, Sergio Pecorelli<sup>e</sup>, Dan-Arin Silasi<sup>b</sup>, Elena Ratner<sup>b</sup>, Masoud Azodi<sup>b</sup>, Peter E. Schwartz<sup>b</sup>, Thomas J. Rutherford<sup>b</sup>, Amy L. Stiegler<sup>f</sup>, Shrikant Mane<sup>a</sup>, Titus J. Boggon<sup>f</sup>, Joseph Schlessinger<sup>f</sup>, Richard P. Lifton<sup>a,1</sup> and Alessandro D. Santin<sup>b</sup>

<sup>a</sup>Department of Genetics, Howard Hughes Medical Institute, Yale University School of Medicine, New Haven, CT 06510; <sup>b</sup>Department of Obstetrics, Gynecology & Reproductive Sciences, <sup>c</sup>Department of Pathology, <sup>d</sup>Internal Medicine & Oncology, Yale University School of Medicine, New Haven, CT, 06510; <sup>e</sup>“Angelo Nocivelli” Institute of Molecular Medicine, Department of Obstetrics, & Gynecology, University of Brescia, Brescia 25123, Italy and <sup>f</sup>Department of Pharmacology, Yale University School of Medicine, New Haven, CT 06510.

<sup>1</sup>To whom correspondence should be addressed: [richard.lifton@yale.edu](mailto:richard.lifton@yale.edu)

## SI Materials and Methods

**Patients and Specimens.** The study protocol was approved by the Yale Human Investigation Committee. DNA was purified and libraries were prepared as described (1). DNA and RNA fractions were isolated from the tissue using an AllPrep DNA/RNA mini kit (Qiagen) per the manufacturer's procedure. Genomic DNA was prepared from venous blood, primary fibroblast cultures or frozen myometrium by standard procedures. Light microscopic evaluation was performed on a hematoxylin and eosin stained section of each frozen tumor specimen submitted to sequencing for assessment of percent tumor nuclei and percent necrosis in addition to other pathology annotations. We confirmed that each section contains a high purity of tumor epithelium (>60%) and minimal necrosis and used those sections for DNA extraction. Primary tumor cell lines purity was tested by morphology and by flow cytometry using pan-cytokeratin antibody staining (i.e., C-11-FITC, ab78478, Abcam Inc. Cambridge, MA). Only cell lines with tumor purity above 90% and less than 3 weeks of culture in vitro were used for sequencing.

**Whole Exome Sequencing.** Genomic DNA was captured on the NimbleGen 2.1M human exome array and subjected to 74 base paired-end reads on the Illumina HiSeq instrument as described (1). Sequence reads were mapped to the reference genome (hg18) using the ELAND program (1). Reads outside the targeted sequences were discarded and statistics on coverage were collected from the remaining reads using perl scripts. ELAND was also used for indel detection (1). For matched normal-tumor pairs, somatic mutations were called by comparing reference and non-reference reads from the matched pair by Fisher's exact test with tumor-specific thresholds determined from approximation of the null distribution (2). For unmatched tumors, SAMtools was used to call variant bases appended with quality scores. Among these, common variants that are listed in public databases were excluded and only rare variants were considered as potential somatic variants. Identified variants were annotated based on novelty, impact on the encoded protein, conservation, and expression using an automated pipeline.

**qRT-PCR.** RNA isolation from all primary USC cell lines was performed using TRIzol Reagent (Invitrogen, Carlsbad, CA, USA), according to the manufacturer's instructions. Quantitative PCR was carried out with a 7500 RealTime PCR System using the manufacturer's recommended protocol (Applied Biosystems, Foster City, CA, USA) to evaluate the expression of PIK3CA, PPP2R1A, FBXW7, HCFC1R1, CNTN4, LRRC7, MYO7B, MED12, TAF1, TTN, YIPF3, KRAS, CHD4, GRIN2A, ZEB2 and ATP1B4. The primers and probes were obtained from Applied Biosystems (i.e., FBXW7, Assay ID: Hs00217794\_m1; CNTN4, Assay ID: Hs00330047\_m1; HCFC1R1, Assay ID: Hs00372415\_m1; TTN, Assay ID: Hs00399225\_m1; TAF1, Assay ID: Hs00270322\_m1; MED12, Assay ID: Hs00192801\_m1; MYO7B, Assay ID: Hs00400099\_m1; LRRC7, Assay ID: Hs00363532\_m1; PIK3CA, Assay ID: Hs00180679\_m1; PPP2R1A, Assay ID: Hs00204426\_m1; YIPF3, Assay ID: Hs00209862\_m1; KRAS, Assay ID: Hs00270666\_m1; CHD4, Assay ID: Hs00172349\_m1; GRIN2A, Assay ID: Hs00168219\_m1; ZEB2, Assay ID: Hs00207691\_m1; TP53, Assay ID: Hs01034249\_m1; ATP1B4, Assay ID: Hs00201320\_m1). The comparative threshold cycle method was used to determine gene expression in each sample, relative to the value observed in non-malignant endometrial epithelial cell samples collected from similar age women, using glyceraldehyde-3-phosphate dehydrogenase (Assay ID Hs99999905\_m1) RNA as an internal control.

1. Choi M et al. (2009). Genetic diagnosis by whole exome capture and massively parallel DNA sequencing. *Proc Natl Acad Sci USA* 106:19096-19101.
2. Choi M et al. (2011) K<sup>+</sup> channel mutations in adrenal aldosterone-producing adenomas and hereditary hypertension. *Science* 11;331:768-72.
3. Lee KR et al. (2003) Tumors of the Ovary and Peritoneum, In: World Health Organization Tumours of the Breast and Female Genital System, Lyon: IARC Press, 113-45.

**Table S1 Clinical features of uterine serous carcinoma patients**

| PairID/<br>SampleID | Sample type         | Status    | Age | Ethnicity <sup>[1]</sup> | Stage <sup>[2]</sup> | Histology <sup>[3]</sup> | Chemo<br>therapy <sup>[4]</sup> |
|---------------------|---------------------|-----------|-----|--------------------------|----------------------|--------------------------|---------------------------------|
| ARK-15N             | Cell line           | Matched   | 67  | E                        | IIIC                 | PURE                     | YES                             |
| ARK-17              | Cell line           | Matched   | 59  | E                        | IIIA                 | PURE                     | NO                              |
| ARK-18              | Cell line           | Matched   | 62  | A                        | IIB                  | PURE                     | NO                              |
| ARK-19              | Cell line           | Matched   | 65  | E                        | IA                   | PURE                     | YES                             |
| ARK1                | Cell line           | Matched   | 62  | A                        | IVA                  | PURE                     | NO                              |
| ARK11               | Cell line           | Matched   | 80  | A                        | IIIC                 | MIXED                    | NO                              |
| ARK13N              | Cell line           | Matched   | 67  | E                        | IVB                  | MIXED                    | YES                             |
| ARK2                | Cell line           | Matched   | 63  | A                        | IVB                  | PURE                     | NO                              |
| ARK6                | Cell line           | Matched   | 48  | E                        | IB                   | MIXED                    | NO                              |
| ARK7                | Cell line           | Matched   | 75  | E                        | IIC                  | PURE                     | NO                              |
| ARK8                | Cell line           | Matched   | 88  | E                        | IIIA                 | PURE                     | NO                              |
| ARK9                | Cell line           | Matched   | 73  | A                        | IIIC                 | MIXED                    | NO                              |
| FF-1                | Fresh frozen tissue | Matched   | 67  | E                        | IIIC                 | PURE                     | NO                              |
| FF-10               | Fresh frozen tissue | Matched   | 69  | E                        | IVA                  | PURE                     | NO                              |
| FF-11               | Fresh frozen tissue | Matched   | 58  | A                        | IA                   | MIXED                    | NO                              |
| FF-12               | Fresh frozen tissue | Matched   | 80  | E                        | IIB                  | MIXED                    | NO                              |
| FF-13               | Fresh frozen tissue | Matched   | 75  | E                        | IIC                  | PURE                     | NO                              |
| FF-14               | Fresh frozen tissue | Matched   | 59  | E                        | REC*                 | PURE                     | YES                             |
| FF-16               | Fresh frozen tissue | Matched   | 54  | E                        | IIIC                 | MIXED                    | NO                              |
| FF-17               | Fresh frozen tissue | Matched   | 73  | A                        | IVB                  | PURE                     | NO                              |
| FF-19               | Fresh frozen tissue | Matched   | 74  | E                        | IVB                  | PURE                     | NO                              |
| FF-2                | Fresh frozen tissue | Matched   | 36  | A                        | IB                   | PURE                     | NO                              |
| FF-3                | Fresh frozen tissue | Matched   | 78  | E                        | IC                   | PURE                     | NO                              |
| FF-35               | Fresh frozen tissue | Matched   | 63  | A                        | IVB                  | PURE                     | NO                              |
| FF-4                | Fresh frozen tissue | Matched   | 64  | E                        | IB                   | PURE                     | NO                              |
| FF-40               | Fresh frozen tissue | Matched   | 57  | E                        | IB                   | PURE                     | NO                              |
| FF-41               | Fresh frozen tissue | Matched   | 65  | E                        | IA                   | PURE                     | NO                              |
| FF-42               | Fresh frozen tissue | Matched   | 71  | H                        | IA                   | PURE                     | YES                             |
| FF-43               | Fresh frozen tissue | Matched   | 67  | E                        | IIIC                 | PURE                     | NO                              |
| FF-5                | Fresh frozen tissue | Matched   | 66  | A                        | IB                   | MIXED                    | NO                              |
| FF-6                | Fresh frozen tissue | Matched   | 63  | A                        | IA                   | PURE                     | NO                              |
| FF-7                | Fresh frozen tissue | Matched   | 49  | A                        | IVA                  | PURE                     | NO                              |
| FF-8                | Fresh frozen tissue | Matched   | 66  | A                        | IVB                  | PURE                     | NO                              |
| FF-9                | Fresh frozen tissue | Matched   | 56  | E                        | IIIC                 | MIXED                    | NO                              |
| USC-FF-18           | Fresh frozen tissue | Unmatched | 72  | E                        | IIIC                 | PURE                     | NO                              |
| USC-FF-20           | Fresh frozen tissue | Unmatched | 65  | E                        | IIC                  | PURE                     | NO                              |
| USC-FF-21           | Fresh frozen tissue | Unmatched | 70  | A                        | IIIA                 | PURE                     | NO                              |
| USC-FF-22           | Fresh frozen tissue | Unmatched | 73  | A                        | IIB                  | PURE                     | NO                              |
| USC-FF-23           | Fresh frozen tissue | Unmatched | 60  | E                        | IB                   | MIXED                    | NO                              |
| USC-FF-24           | Fresh frozen tissue | Unmatched | 60  | E                        | IIIA                 | MIXED                    | NO                              |

|                    |                     |           |    |   |      |       |     |
|--------------------|---------------------|-----------|----|---|------|-------|-----|
| <b>USC-FF-25</b>   | Fresh frozen tissue | Unmatched | 76 | A | IVB  | PURE  | NO  |
| <b>USC-FF-26</b>   | Fresh frozen tissue | Unmatched | 76 | A | IIIC | PURE  | NO  |
| <b>USC-FF-27</b>   | Fresh frozen tissue | Unmatched | 57 | E | IIC  | PURE  | NO  |
| <b>USC-FF-28</b>   | Fresh frozen tissue | Unmatched | 71 | E | IIIA | PURE  | NO  |
| <b>USC-FF-29</b>   | Fresh frozen tissue | Unmatched | 70 | A | IB   | PURE  | NO  |
| <b>USC-FF-30</b>   | Fresh frozen tissue | Unmatched | 77 | E | IIIA | MIXED | NO  |
| <b>USC-FF-31</b>   | Fresh frozen tissue | Unmatched | 70 | E | IIA  | PURE  | NO  |
| <b>USC-FF-32</b>   | Fresh frozen tissue | Unmatched | 75 | E | IIIC | PURE  | YES |
| <b>USC-FF-33</b>   | Fresh frozen tissue | Unmatched | 66 | A | IIIC | PURE  | YES |
| <b>USC-FF-34</b>   | Fresh frozen tissue | Unmatched | 62 | E | IA   | PURE  | NO  |
| <b>USC-FF-36</b>   | Fresh frozen tissue | Unmatched | 55 | A | IIB  | PURE  | NO  |
| <b>USC-FF-37</b>   | Fresh frozen tissue | Unmatched | 74 | H | IIIC | PURE  | YES |
| <b>USC-FF-38</b>   | Fresh frozen tissue | Unmatched | 76 | E | IIIC | PURE  | NO  |
| <b>USC-FF-39</b>   | Fresh frozen tissue | Unmatched | 81 | A | IVB  | PURE  | NO  |
| <b>USPC-ARK-20</b> | Cell line           | Unmatched | 42 | E | IIB  | PURE  | NO  |
| <b>USPC-ARK10</b>  | Cell line           | Unmatched | 79 | E | IVB  | PURE  | NO  |
| <b>USPC-ARK4</b>   | Cell line           | Unmatched | 82 | E | IVB  | PURE  | NO  |

[1] Race information comes from PCA analysis. A, African; E, European; H, Hispanic.

[2] The staging used in the table is the 1988 FIGO (International Federation of Gynaecology and Obstetrics) staging system.

\*REC denotes that recurrent tumor was sequenced.

[3] For uniformity with the current literature we have used the World Health Organization guidelines for epithelial tumors (i.e., USC that contain <10% of a second malignant component are considered 'pure' USC) (3).

[4] Chemotherapy yes means that the tumor biopsy we have sequenced was collected after the patient had received chemotherapy (i.e, carboplatin and paclitaxel).

**Table S2 Exome run quality summary for all samples**

| <b>Sample origin</b>                   | <b>Matched</b> |              | <b>Unmatched</b> |
|----------------------------------------|----------------|--------------|------------------|
| <b>Number</b>                          | <b>34</b>      | <b>34</b>    | <b>23</b>        |
| <b>Status</b>                          | <b>Normal</b>  | <b>Tumor</b> | <b>Tumor</b>     |
| <b>Lanes used</b>                      | 1/3            | 2/3          | 2/3              |
| <b>Single end / Paired ends</b>        | PE             | PE           | PE               |
| <b>Read length</b>                     | 74 bp          | 74 bp        | 74 bp            |
| <b># of reads per lane (M)</b>         | 89             | 188          | 175              |
| <b>Median coverage (X)</b>             | 84             | 165          | 144              |
| <b>Mean coverage (X)</b>               | 100            | 199          | 170              |
| <b>% on genome</b>                     | 92.33%         | 92.21%       | 92.60%           |
| <b>% on target</b>                     | 73.43%         | 68.98%       | 62.76%           |
| <b>% of bases covered at least 4x</b>  | 97.16%         | 97.93%       | 97.78%           |
| <b>% of bases covered at least 8x</b>  | 95.63%         | 97.06%       | 96.89%           |
| <b>% of bases covered at least 20x</b> | 90.33%         | 94.66%       | 94.20%           |
| <b>Mean error rate</b>                 | 0.42%          | 0.49%        | 0.47%            |
| <b>% of PCR duplicate</b>              | 4.95%          | 9.98%        | 7.63%            |

**Table S3 Mismatch repair gene mutations and POLE mutations in hypermutated samples**

| Sample | Matched/<br>unmatched | Gene | Status          | AA change     | AA location/<br>protein length | P-value/QS* | LOH** |
|--------|-----------------------|------|-----------------|---------------|--------------------------------|-------------|-------|
| ARK6T  | Matched               | MLH1 | Missense        | E89D          | 89/756                         | 1.23E-29    | no    |
|        |                       | MLH1 | Missense        | P705S         | 705/756                        | 3.05E-18    | no    |
|        |                       | MLH3 | Missense        | A1246T        | 1246/1453                      | 7.30E-16    | no    |
|        |                       | MSH6 | <u>Nonsense</u> | <u>E1322X</u> | 1322/1360                      | 8.68E-11    | no    |
|        |                       | POLE | Missense        | C1642Y        | 1642/2286                      | 4.74E-06    | no    |
|        |                       | POLE | Missense        | A1967V        | 1967/2286                      | 2.98E-65    | no    |
|        |                       | POLE | Missense        | G2076V        | 2076/2286                      | 9.83E-12    | no    |
|        |                       | POLE | Missense        | L2207I        | 2207/2286                      | 1.11E-11    | no    |
|        |                       | POLE | Missense        | D368Y         | 368/2286                       | 3.19E-25    | no    |
|        |                       | POLE | Missense        | H67N          | 67/2286                        | 7.44E-25    | no    |
|        |                       | POLE | Missense        | A832T         | 832/2286                       | 1.28E-07    | no    |
| FF-4T  | Matched               | MLH3 | <u>Nonsense</u> | <u>E1288X</u> | 1288/1453                      | 1.72E-09    | no    |
|        |                       | MSH2 | <u>Nonsense</u> | <u>E580X</u>  | 580/934                        | 4.34E-07    | no    |
|        |                       | MSH3 | Missense        | A396T         | 396/1137                       | 3.88E-07    | no    |
|        |                       | PMS1 | Missense        | R93C          | 93/932                         | 2.68E-10    | no    |
|        |                       | PMS2 | Missense        | L266I         | 266/862                        | 1.24E-07    | no    |
|        |                       | POLE | Missense        | M295R         | 295/2286                       | 2.32E-08    | no    |
| FF-9T  | Matched               | MLH3 | Missense        | P1178H        | 1178/1453                      | 2.66E-15    | no    |
|        |                       | MSH2 | <u>Nonsense</u> | <u>R680X</u>  | 680/934                        | 5.71E-23    | no    |
|        |                       | MSH2 | Missense        | E749A         | 749/934                        | 1.65E-16    | no    |
|        |                       | MSH3 | Missense        | Y1011H        | 1011/1137                      | 2.22E-24    | no    |
|        |                       | MSH6 | Missense        | A1055T        | 1055/1360                      | 1.78E-06    | no    |
|        |                       | PMS1 | Missense        | L252R         | 252/932                        | 6.13E-15    | no    |
|        |                       | POLE | Missense        | T1052M        | 1052/2286                      | 1.08E-05    | no    |
|        |                       | POLE | Missense        | V1452A        | 1452/2286                      | 9.36E-17    | no    |
|        |                       | POLE | <u>Missense</u> | <u>V411L</u>  | 411/2286                       | 7.41E-11    | no    |
|        |                       | POLE | Missense        | R742C         | 742/2286                       | 6.04E-23    | no    |
|        |                       | POLE | Missense        | R77C          | 77/2286                        | 4.76E-22    | no    |
| FF-40T | Matched               | MSH2 | Missense        | D91Y          | 91/934                         | 3.45E-05    | no    |
|        |                       | POLE | Missense        | F1099S        | 1099/2286                      | 8.74E-05    | no    |
|        |                       | POLE | Missense        | F1672L        | 1672/2286                      | 3.55E-23    | no    |
|        |                       | POLE | <u>Missense</u> | <u>V411L</u>  | 411/2286                       | 5.98E-15    | no    |
|        |                       | POLE | Missense        | Y470H         | 470/2286                       | 2.21E-32    | no    |
|        |                       | POLE | Missense        | S928I         | 928/2286                       | 6.23E-29    | no    |
| FF-24  | Unmatched             | MLH1 | Missense        | L585F         | 585/756                        | 228         | no    |
|        |                       | MSH3 | Missense        | M953I         | 953/1137                       | 228         | no    |
|        |                       | MSH6 | Missense        | M1326T        | 1326/1360                      | 228         | no    |
|        |                       | POLE | Missense        | P1164S        | 1164/2286                      | 140         | no    |

Underlined mutations highlights damaging mutations and recurrent mutations

\*Fisher p-value, showing likelihood of the somatic calls being real. Most of cases,  $p = 10^{-4}$  is the cutoff value. For calls from unmatched samples, quality scores from Samtools are given since Fisher p-values are not available for these cases

\*\*LOH, loss of heterozygosity

**Table S4 Significantly duplicated intervals**

| Chr   | Start     | End       | Size     | Frequency | Gene number : gene list*                                                                                                                                                                          | Cancer gene**                                              |
|-------|-----------|-----------|----------|-----------|---------------------------------------------------------------------------------------------------------------------------------------------------------------------------------------------------|------------------------------------------------------------|
| chr3  | 173500000 | 195000000 | 21500000 | 15        | <b>128</b>                                                                                                                                                                                        | ETV5, PIK3CA, LPP, SOX2, BCL6, EIF4A2                      |
| chr1  | 223500000 | 224500000 | 1000000  | 14        | <b>15:</b> DNAH14, EPHX1, LBR, H3F3A, LIN9, H3F3AP4, ENAH, LEFTY2, SRP9, LEFTY1, ACBD3, TMEM63A, C1orf55, PYCR2, MIXL1                                                                            | H3F3A                                                      |
| chr17 | 35000000  | 35500000  | 500000   | 11        | <b>21:</b> NEUROD2, TCAP, PGAP3, PPP1R1B, ORMDL3, ERBB2, GSDMA, GSDMB, PSMD3, MIR4728, CSF3, MED24, PNMT, GRB7, THRA, STARD3, SNORD124, LRRC3C, MIEN1, IKZF3, ZPBP2                               | ERBB2                                                      |
| chr19 | 34500000  | 35500000  | 1000000  | 11        | <b>7:</b> PLEKHF1, VSTM2B, CCNE1, POP4, LOC284395, C19orf12, URI1                                                                                                                                 | CCNE1                                                      |
| chr8  | 55000000  | 142000000 | 87000000 | 11        | <b>373</b>                                                                                                                                                                                        | NCOA2, CHCHD7, EXT1, TCEA1, NDRG1, MYC, PLAG1, COX6C, HEY1 |
| chr20 | 29500000  | 30000000  | 500000   | 10        | <b>16:</b> BCL2L1, TPX2, PDRG1, REM1, MYLK2, FOXS1, ID1, COX4I2, TTL9, PSIMCT-1, DUSP15, DEFB124, DEFB123, HM13, MIR3193, LINC00028                                                               |                                                            |
| chr11 | 75500000  | 76000000  | 500000   | 9         | <b>4:</b> UVRAG, PRKRIR, WNT11, C11orf30                                                                                                                                                          |                                                            |
| chr12 | 23500000  | 24000000  | 500000   | 9         | <b>1:</b> SOX5                                                                                                                                                                                    |                                                            |
| chr14 | 21500000  | 22000000  | 500000   | 9         | <b>0</b>                                                                                                                                                                                          |                                                            |
| chr13 | 111000000 | 113000000 | 2000000  | 8         | <b>13:</b> MCF2L-AS1, PROZ, C13orf35, F7, PCID2, MCF2L, TUBGCP3, CUL4A, SPACA7, LAMP1, ATP11A, F10, SOX1                                                                                          |                                                            |
| chr18 | 12500000  | 23000000  | 10500000 | 8         | <b>57</b>                                                                                                                                                                                         | SS18, ZNF521                                               |
| chr16 | 29500000  | 30000000  | 500000   | 7         | <b>24:</b> DOC2A, ASPHD1, LOC440356, PRRT2, CDIPT, QPRT, SLC7A5P1, PPP4C, SPN, MVP, FAM57B, ZG16, ALDOA, INO80E, SEZ6L2, TAOK2, KCTD13, MAZ, KIF22, C16orf92, C16orf53, TMEM219, C16orf54, HIRIP3 |                                                            |
| chr6  | 11000000  | 11500000  | 500000   | 7         | <b>6:</b> SYCP2L, ERVFRD-1, NEDD9, C6orf228, ELOVL2, LOC100506409                                                                                                                                 |                                                            |

\* Gene names listed if gene number less than 50. Otherwise, gene names can be accessed using the coordinates provided in the table via portals such as the UCSC genome browser (<http://genome.ucsc.edu/cgi-bin/hgGateway>)

\*\* Cancer gene: COSMIC cancer census gene

**Table S5 Significantly deleted intervals**

| Chr   | Start    | End       | Size     | Frequency | Gene number : gene list *                                                                                                                                                                                                                                                                     | Cancer gene**              |
|-------|----------|-----------|----------|-----------|-----------------------------------------------------------------------------------------------------------------------------------------------------------------------------------------------------------------------------------------------------------------------------------------------|----------------------------|
| chr22 | 49000000 | 49500000  | 500000   | 18        | 24:LMF2, CHKB-CPT1B, ODF3B, SBF1, MIOX, MAPK11, MAPK12, CHKB, PLXNB2, SYCE3, FAM116B, ADM2, CPT1B, PPP6R2, KLHDC7B, SHANK3, MAPK8IP2, NCAPH2, ARSA, TYMP, LOC100144603, HDAC10, TUBGCP6, SCO2                                                                                                 |                            |
| chr19 | 1500000  | 2000000   | 500000   | 17        | 17:REXO1, SCAMP4, KLF16, TCF3, ONECUT3, UQCR11, MIR1909, ADAT3, ATP8B3, MKNK2, CSNK1G2-AS1, LOC100288123, MBD3, CSNK1G2, MEX3D, FAM108A1, BTBD2                                                                                                                                               | TCF3                       |
| chr16 | 85500000 | 88000000  | 2500000  | 15        | 35:TRAPPC2L, LOC100287036, CDH15, ZCCHC14, ZFPM1, JPH3, KLHDC4, ANKRD11, MGC23284, PABPN1L, CDT1, CBFA2T3, CTU2, C16orf95, LOC400558, ZC3H18, MAP1LC3B, LINC00304, CA5A, SLC7A5, MIR4722, BANP, IL17C, PIEZO1, ACSF3, GALNS, APRT, CYBA, MVD, SNAI3, RNF166, SLC22A31, ZNF469, FBXO31, ZNF778 | CBFA2T3                    |
| chr4  | 99000000 | 179000000 | 80000000 | 14        | 310                                                                                                                                                                                                                                                                                           | FBXW7, TET2, IL2, RAP1GDS1 |
| chr17 | 28000000 | 32000000  | 4000000  | 13        | 63                                                                                                                                                                                                                                                                                            | TAF15                      |
| chr8  | 2000000  | 3500000   | 1500000  | 13        | 2:MYOM2, CSMD1                                                                                                                                                                                                                                                                                |                            |
| chr15 | 73000000 | 85000000  | 12000000 | 12        | 135                                                                                                                                                                                                                                                                                           |                            |
| chr3  | 53000000 | 55500000  | 2500000  | 12        | 15:CACNA2D3, SELK, ESRG, ACTR8, CACNA1D, PRKCD, SFMBT1, TKT, LRTM1, DCP1A, CHDH, RFT1, WNT5A, MIR1303, IL17RB                                                                                                                                                                                 |                            |
| chr9  | 94500000 | 96000000  | 1500000  | 11        | 19:MIRLET7F1, MIRLET7D, FGD3, ANKRD19P, NINJ1, FAM120A, ZNF484, PTPDC1, LOC158257, WNK2, BARX1, C9orf89, C9orf129, MIR4291, MIRLET7A1, FAM120AOS, PHF2, BICD2, SUSD3                                                                                                                          |                            |
| chr11 | 0        | 500000    | 500000   | 10        | 19:LOC100133161, ODF3, RIC8A, NLRP6, ANO9, IFITM5, IFITM2, PTDSS2, IFITM1, PSMD13, SCGB1C1, B4GALNT4, PKP3, ATHL1, SIGIRR, IFITM3, BET1L, SIRT3, RNH1                                                                                                                                         |                            |
| chr13 | 28500000 | 31000000  | 2500000  | 10        | 15:C13orf33, TEX26, USPL1, UBL3, LOC440131, LOC728437, LINC00426, KATNAL1, SLC7A1, TEX26-AS1, MTUS2, ALOX5AP, B3GALT1, HMGB1, HSPH1                                                                                                                                                           |                            |
| chr19 | 50000000 | 54500000  | 4500000  | 9         | 186                                                                                                                                                                                                                                                                                           | ERCC2                      |

\* Gene names listed if gene number less than 50. Otherwise, gene names can be accessed using the coordinates provided in the table via portals such as the UCSC genome browser (<http://genome.ucsc.edu/cgi-bin/hgGateway>)

\*\* Cancer gene: COSMIC cancer census gene



**Table S6 Comparison with high-grade ovarian serous carcinoma (HGS-OvCa)**

|          | USC(n=52)              |            | HGS-OvCa(n=316)        |            |
|----------|------------------------|------------|------------------------|------------|
|          | Affected sample number | Percentage | Affected sample number | Percentage |
| PIK3CA*  | 12                     | 23.08%     | 5                      | 1.58%      |
| CHD4*    | 10                     | 19.23%     | 8                      | 2.53%      |
| FBXW7*   | 9                      | 17.31%     | 3                      | 0.95%      |
| PPP2R1A* | 8                      | 15.38%     | 4                      | 1.27%      |
| TAF1*    | 7                      | 13.46%     | 5                      | 1.58%      |
| KRAS*    | 3                      | 5.77%      | 2                      | 0.63%      |
| PTEN*    | 3                      | 5.77%      | 0                      | 0.00%      |
| HCFC1R1* | 2                      | 3.85%      | 0                      | 0.00%      |
| CDKN1A*  | 2                      | 3.85%      | 1                      | 0.32%      |
| CTDSPL*  | 2                      | 3.85%      | 0                      | 0.00%      |
| YIPF3*   | 2                      | 3.85%      | 0                      | 0.00%      |
| SPOP*    | 2                      | 3.85%      | 1                      | 0.32%      |
| FAM132A* | 2                      | 3.85%      | 0                      | 0.00%      |
| TP53##   | 31                     | 59.62%     | 303                    | 95.89%     |
| BRAC1#   | 0                      | 0.00%      | 11                     | 3.48%      |
| CSMD3#   | 0                      | 0.00%      | 19                     | 6.01%      |
| NF1#     | 1                      | 3.33%      | 13                     | 4.11%      |
| CDK12#   | 0                      | 0.00%      | 9                      | 2.85%      |
| FAT3#    | 2                      | 6.67%      | 19                     | 6.01%      |
| GABRA6#  | 0                      | 0.00%      | 7                      | 1.90%      |
| BRCA2#   | 0                      | 0.00%      | 10                     | 3.16%      |
| RB1#     | 0                      | 0.00%      | 6                      | 1.90%      |

\*Significantly mutated genes in USC

#Significantly mutated genes in HGS-OvCa

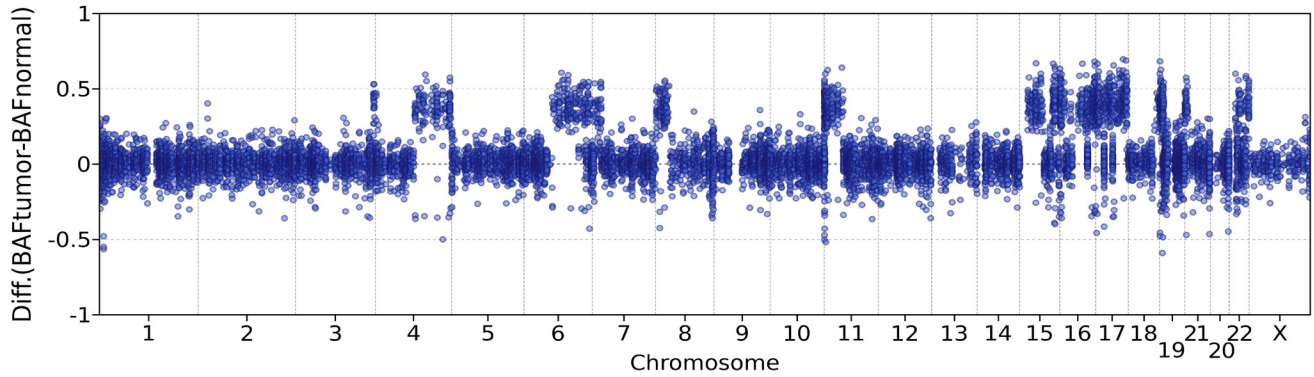

**Fig. S1. Loss of heterozygosity calling from FF-12 tumor-normal pair.**

Heterozygous SNP locus from normal sample of FF-12 was extracted and the difference of B allele frequency (BAF) change in tumor sample is plotted along the genome. Regions with obvious shift in BAF change were called as LOH by manual curation. For example, chr4, 6, 7, 8, 11, 15, 16, 17, 19, 20, 22 all have LOH regions. Purity was estimated by averaged absolute BAF change in LOH regions multiplied by 2.

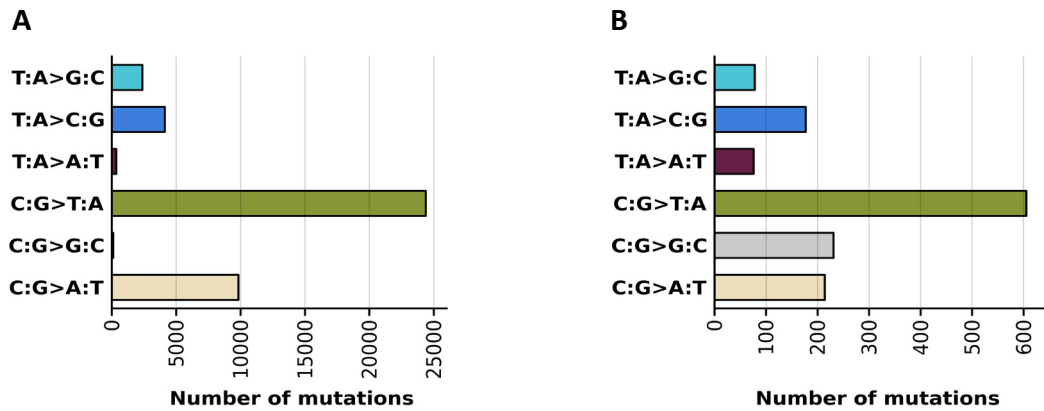

**Fig. S2. Mutation spectrum in USC.**

The numbers of base substitution in each of the 6 classes are shown. A. Plot for 4 tumors with hypermutator phenotype. B. Plot for 30 moderately mutated tumors.

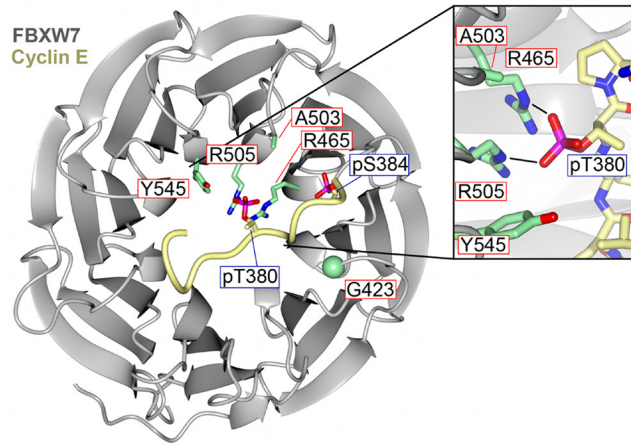

**Fig. S3. Mapping of USC mutations onto the crystal structure of FBXW7 in complex with its high-affinity recognition motif in cyclin E.**

FBXW7 is shown in grey and the doubly-phosphorylated cyclin E peptide in yellow, with phosphorylated residues labeled (PDB ID: 2OVQ). Residues of FBXW7 found mutated in USC are shown in green and labeled. Inset shows close up of the interaction with black lines indicating hydrogen-bonds.

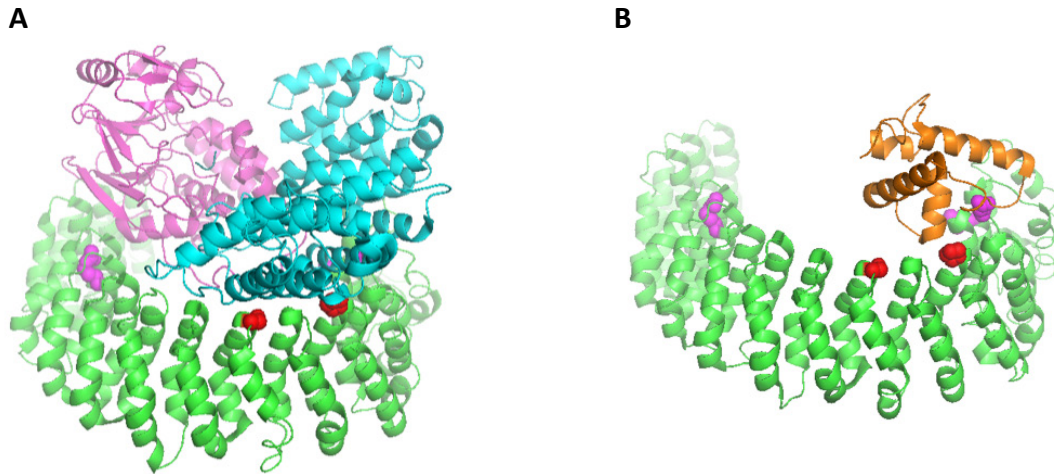

**Fig. S4. Somatic mutations in PPP2R1A may affect its interaction with other proteins.**  
**A. PP2A Holo-enzyme** P179 and S256 make up part of the A-B interface. Green, subunit A; blue, subunit B; light purple, subunit C. Recurrently mutated amino acids P179 and S256 are labeled in red, singletons are labeled in purple. **B. SV40 and subunit A** SV40 virus binds regulatory subunit A with an overlapping site to the A-B interaction. Green, subunit A; orange, SV40 ; red, P179 (recurrently mutated) and S256 (recurrently mutated); purple, positions for singleton mutations.

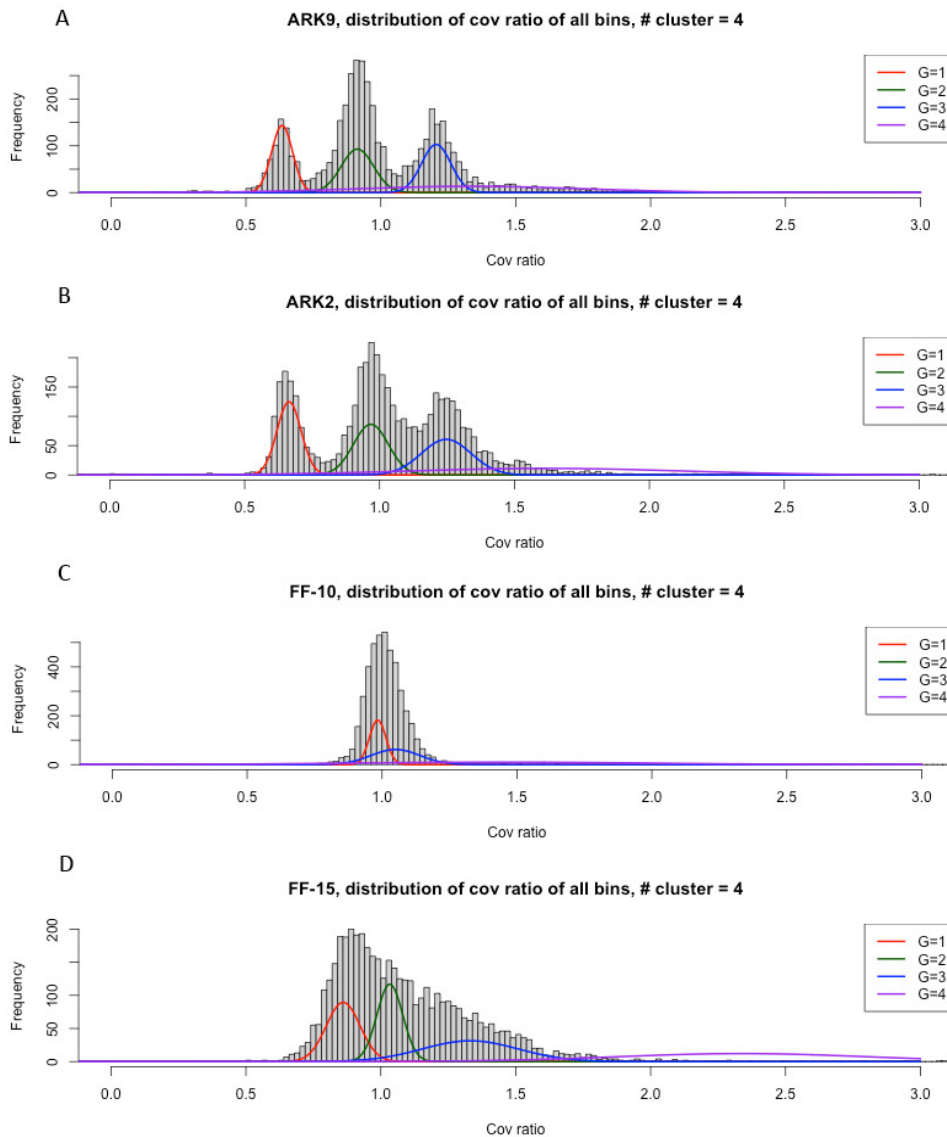

**Fig. S5. Patterns of distribution of coverage depth ratio in different USC samples.**

The distribution of coverage depth ratio (cov ratio) was plotted for each of the 34 matched normal tumor pairs. Unsupervised clustering was performed to identify potential clusters with coverage ratio deviated from 1 caused by copy number variation (red, green, blue and purple curves). 4 examples representing typical distribution patterns in these samples are shown. Only samples with cov ratio patterns similar to A, B and C were used for further CNV analysis (n=25) while samples like D were discarded in CNV analysis due to noise.

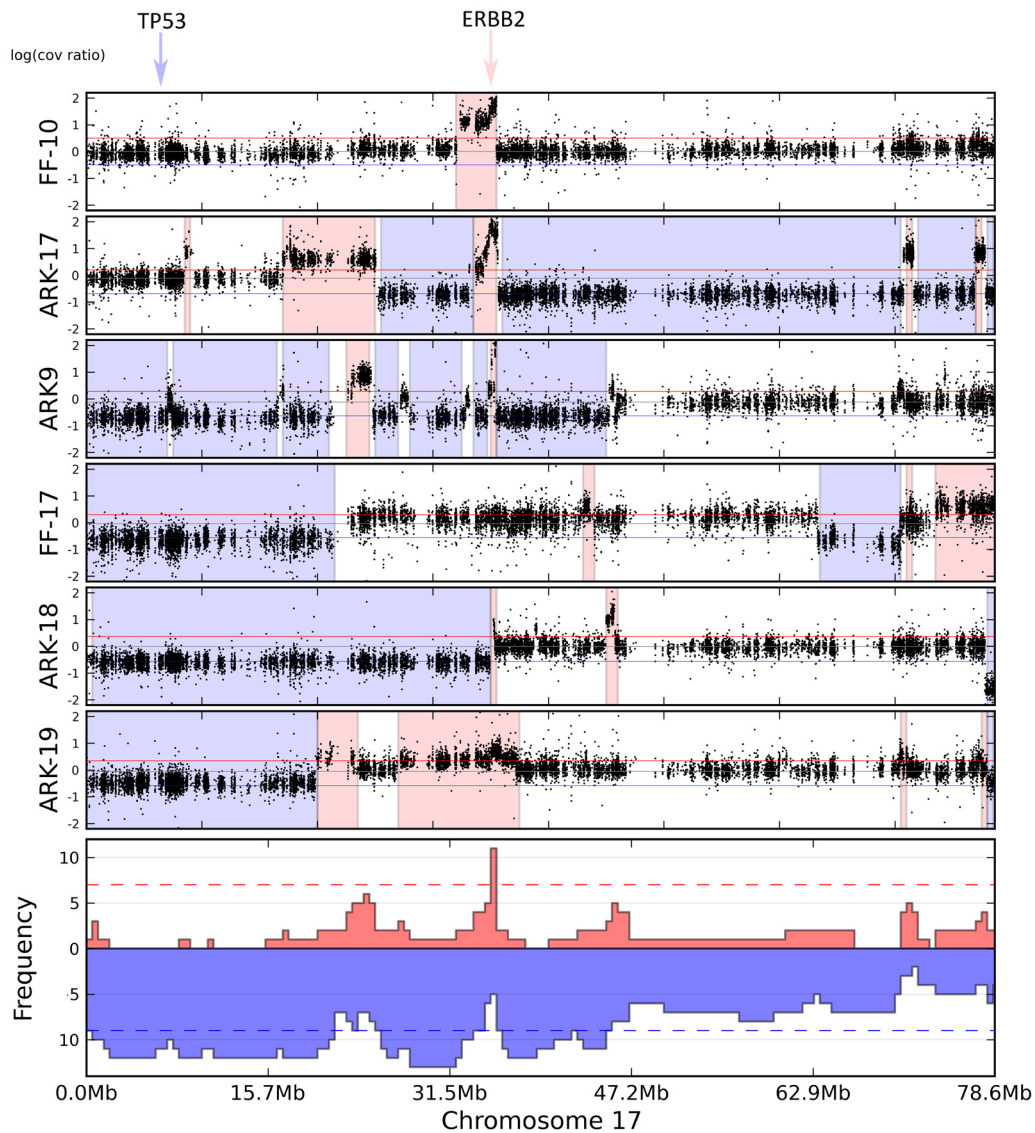

**Fig. S6. Focal amplification on chromosome 17 (ERBB2) and chr17p deletion (TP53).**

Log of coverage depth ratio is plotted across chromosome 17. 6 samples (FF-10, ARK-17, ARK9, FF-17, ARK-18 and ARK-19) are shown in parallel with the bottom subplot showing CNV frequency for all samples analyzed (n=25). The positions of ERBB2 and TP53 are marked. Horizontal red line, CNV duplication cluster center; horizontal blue line, CNV deletion cluster center; horizontal grey line, copy neutral cluster center; horizontal red and blue dotted line in bottom frequency plot, CNV gain and loss genome wide significance level.

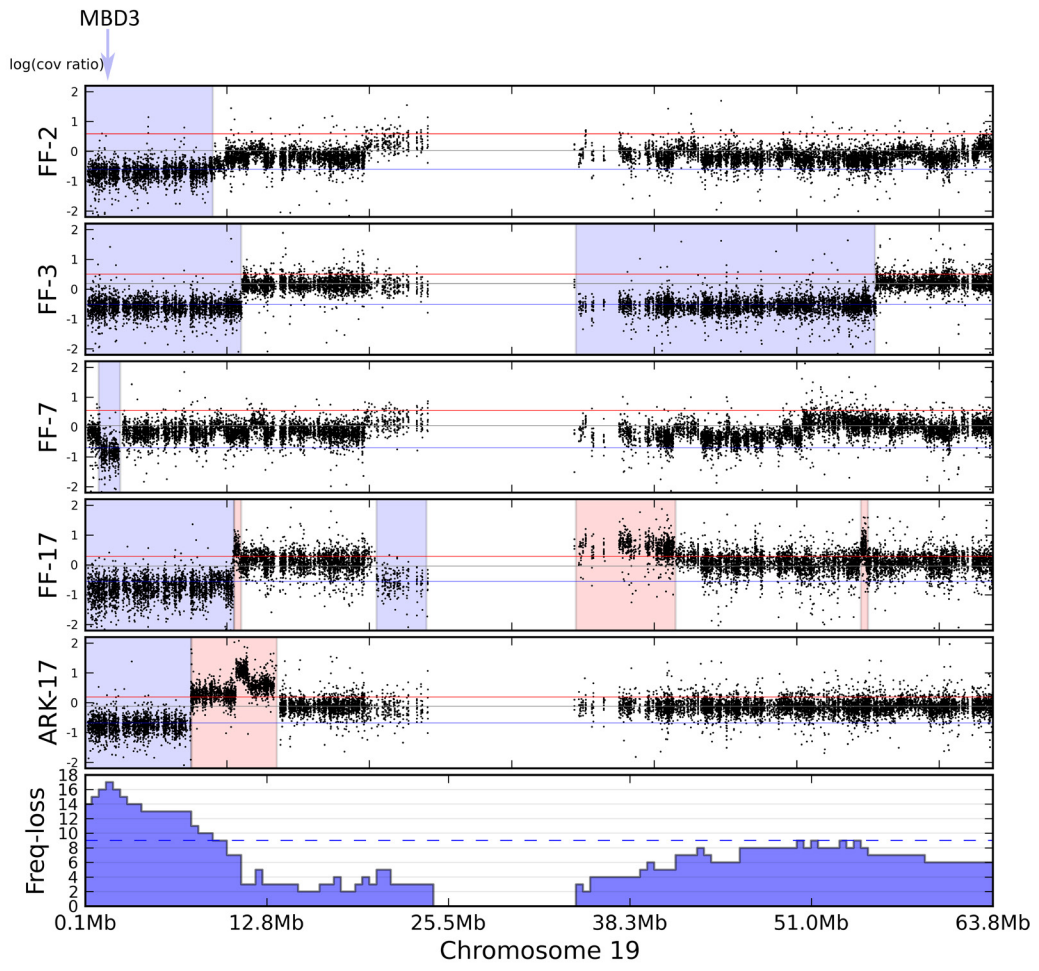

**Fig. S7. Focal deletion on chromosome 19p (MBD3).**

See Fig. S6 for legend.



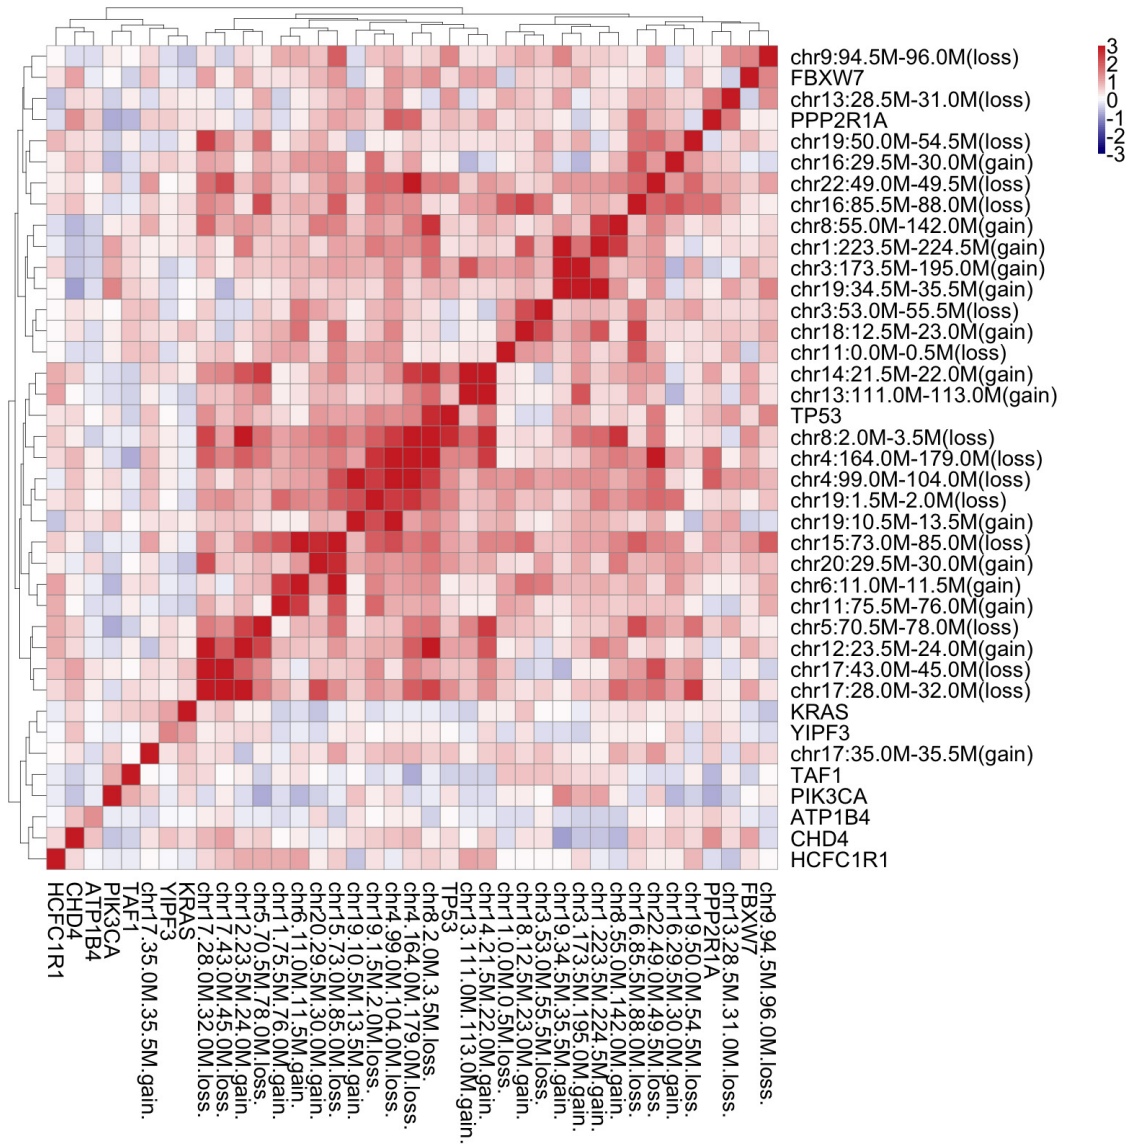

**Fig. S8. Pairwise correlation/exclusion study for significantly mutated genes and significant CNVs.**

Heat map depicting patterns of correlation and exclusion in USC is shown. Significantly mutated genes from 30 matched samples and significant CNV events from 25 matched samples were included in this study. Pairwise correlation or exclusion p value was calculated based on permutation. Red, correlation; blue, exclusion.

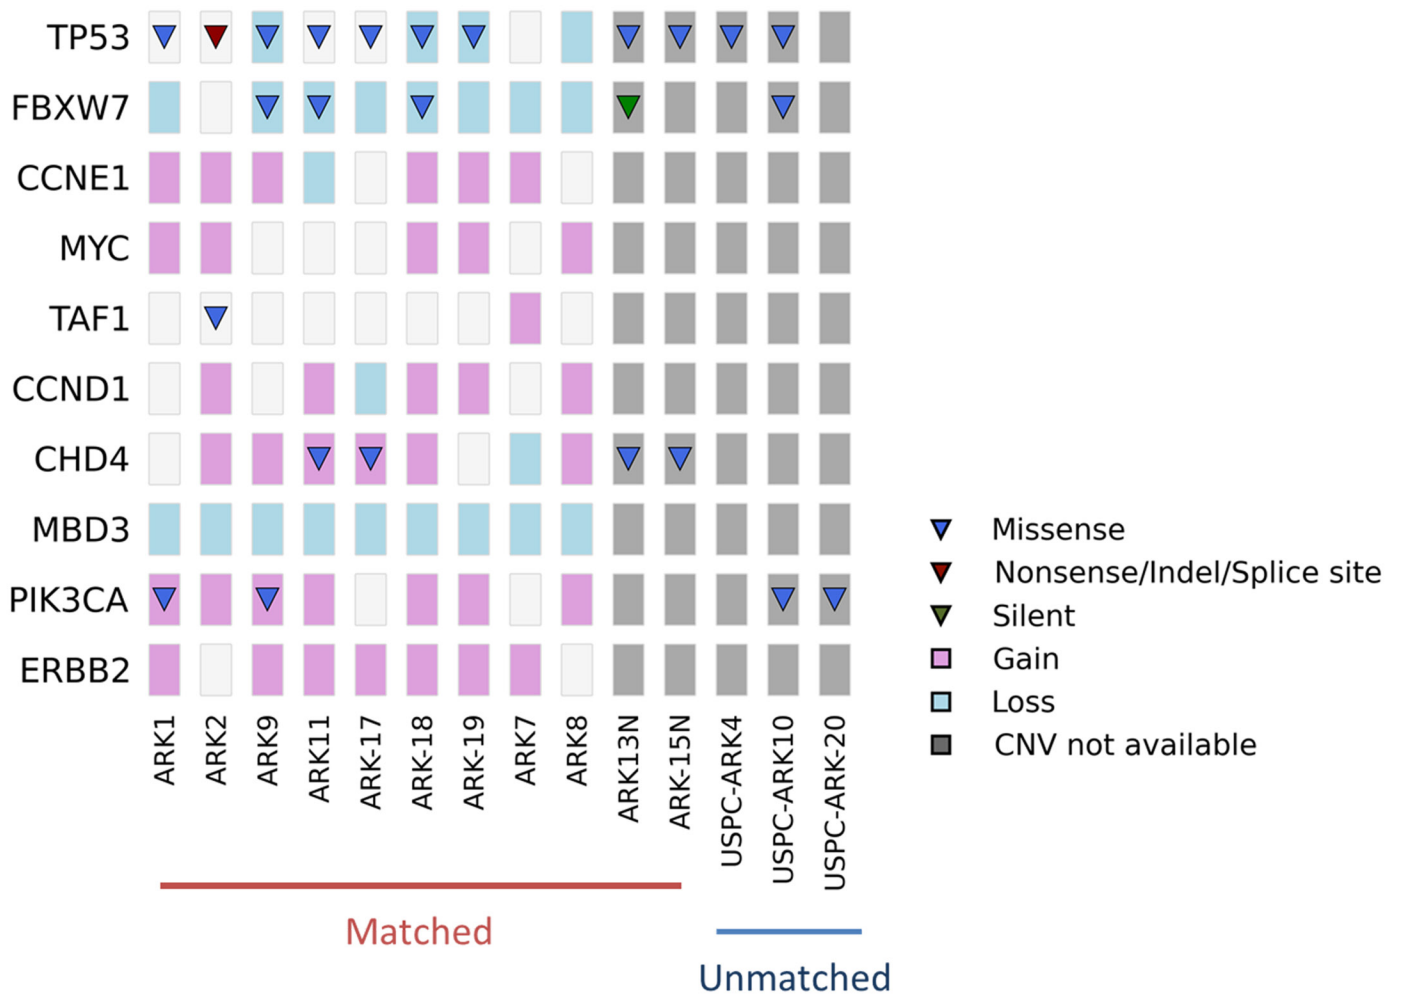

**Fig. S9. Mutation profile in 14 USC cell lines.**

The distribution of SNVs and CNVs in 14 USC cell lines is shown. CNV calls were not made in cell lines without matched normal DNA for comparison. One additional cell line (not shown) had the hypermutator phenotype.
